# Supplementary material
Source: Frontiers journal article supplement (https://www.frontiersin.org/articles/559991)
Supplement: Table_1.pdf [file Table_1.pdf]

**Supplementary Table 1.** List of all publications included in the final analysis of the scoping review on the use of the term ‘Planetary Health’ in the peer-reviewed literature.

| <b>Author(s)</b>                                                                                                                             | <b>Title</b>                                                                                                                              | <b>Year of publication</b> | <b>Journal/publisher</b>                             |
|----------------------------------------------------------------------------------------------------------------------------------------------|-------------------------------------------------------------------------------------------------------------------------------------------|----------------------------|------------------------------------------------------|
| Acunzo, David J;<br>Escher, Gerard;<br>Ottersen, Ole P;<br>Whittington, Jason D;<br>Gillet, Philippe;<br>Stenseth, Nils C;<br>Negrutiu, Ioan | Framing Planetary Health:<br>arguing for resource-centred<br>science                                                                      | 2018                       | The Lancet Planetary<br>Health                       |
| Admasu, Kesetebirhan;<br>Debessa, Kare                                                                                                       | Action to protect human health<br>from climate change: an African<br>perspective                                                          | 2015                       | The Lancet                                           |
| Aginam, Obijiofor                                                                                                                            | Global governance approaches to<br>Planetary Health in: One Planet,<br>One Health                                                         | 2019                       | Sydney University<br>Press                           |
| Ağırbaşı, Deniz;<br>Ağırbaşı, Mehmet                                                                                                         | A Planetary Health lens for rare<br>diseases in refugee populations<br>and innovating systems medicine<br>education                       | 2019                       | OMICS: A Journal of<br>Integrative Biology           |
| Aguirre, Alonso; Basu,<br>Niladri; Kahn, Laura H;<br>Morin, Xenia K;<br>Echaubard, Pierre;<br>Wilcox, Bruce A;<br>Beasley, Val R             | Transdisciplinary and social-<br>ecological health frameworks -<br>Novel approaches to emerging<br>parasitic and vector-borne<br>diseases | 2019                       | Parasite Epidemiology<br>and Control                 |
| Al-Delaimy, Wael K                                                                                                                           | Planetary Health and population<br>health: the Anthropocene requires<br>different thinking and approaches<br>in serving public health     | 2018                       | Current Environmental<br>Health Reports              |
| Alders, R; de Bruyn, J;<br>Wingett, K; Wong, J                                                                                               | One Health, veterinarians and the<br>nexus between disease and food<br>security                                                           | 2017                       | Australian Veterinary<br>Journal                     |
| Alders, Robyn G                                                                                                                              | Achieving ethical and<br>ecologically sustainable human<br>diets through the Planetary Health<br>paradigm                                 | 2017                       | Journal of Nutrition &<br>Intermediary<br>Metabolism |
| Alders, Robyn G;<br>Ratanawongprasat,<br>Natalie; Schönfeldt,<br>Hettie; Stellmach,<br>Darryl                                                | A Planetary Health approach to<br>secure, safe, sustainable food<br>systems: workshop report                                              | 2018                       | Food Security                                        |
| Almada, Amalia A;<br>Golden, Christopher D;<br>Osofsky, Steven A;<br>Myers, Samuel S                                                         | A case for Planetary<br>Health/GeoHealth                                                                                                  | 2017                       | Geoscience Data<br>Journal                           |
| Almada, Amalia;<br>Myers, Samuel S;                                                                                                          | Planetary Health Alliance 2019<br>call for abstracts                                                                                      | 2019                       | The Lancet Planetary<br>Health                       |

|                                                                                                                                                                                                                                                                                                                                                 |                                                                                                                                                             |      |                                         |
|-------------------------------------------------------------------------------------------------------------------------------------------------------------------------------------------------------------------------------------------------------------------------------------------------------------------------------------------------|-------------------------------------------------------------------------------------------------------------------------------------------------------------|------|-----------------------------------------|
| Golden, Christopher D;<br>Burke, Katherine S;<br>Luby, Stephen P                                                                                                                                                                                                                                                                                |                                                                                                                                                             |      |                                         |
| Anonymous                                                                                                                                                                                                                                                                                                                                       | Plenary 3-All for Health: the contribution of science to Planetary Health                                                                                   | 2016 | European Journal of Public Health       |
| Anonymous                                                                                                                                                                                                                                                                                                                                       | Power, politics and population health: the strength of collaboration                                                                                        | 2018 | MEDICC Review                           |
| Anonymous                                                                                                                                                                                                                                                                                                                                       | Pushing for Planetary Health diets                                                                                                                          | 2019 | Food Australia                          |
| Anonymous                                                                                                                                                                                                                                                                                                                                       | Vector control: time for a Planetary Health approach                                                                                                        | 2017 | The Lancet Global Health                |
| Asuzu, Michael C.;<br>Onajole, Adebayo T.;<br>Disu, Yahya                                                                                                                                                                                                                                                                                       | Public health at all levels in the recent Nigerian Ebola viral infection epidemic: lessons for community, public and international health action and policy | 2015 | Journal of Public Health Policy         |
| Baker, Anthony                                                                                                                                                                                                                                                                                                                                  | Report from ASM 2017: Planetary Health                                                                                                                      | 2017 | Microbiology Australia                  |
| Baldwin, Cathy;<br>Rawstone, Patrick                                                                                                                                                                                                                                                                                                            | Public understanding of risk in health impact assessment: a psychosocial approach                                                                           | 2019 | Impact Assessment and Project Appraisal |
| Barrett, M J;<br>Alphonsus, Khisha B;<br>Harmin, Matt; Epp, Tasha; Hoessler, Carolyn; McIntyre, Danielle; Reeder, Bruce; Singh, Baljit                                                                                                                                                                                                          | Learning for transdisciplinary leadership: why skilled scholars coming together is not enough                                                               | 2019 | BioScience                              |
| Beaglehole, Robert                                                                                                                                                                                                                                                                                                                              | Healthy planet, healthy people                                                                                                                              | 2016 | The Lancet                              |
| Beaglehole, Robert                                                                                                                                                                                                                                                                                                                              | Lethal but lawful: holding corporations to account                                                                                                          | 2014 | The Lancet                              |
| Beauman, C.; Cannon, G.; Elmadfa, I.; Glasauer, P.; Hoffmann, I.; Keller, M.; Krawinkel, M.; Lang, T.; Leitzmann, C.; Lotsch, B.; Margetts, B. M.; McMichael, A. J.; Meyer-Abich, K.; Oltersdorf, U.; Pettoello-Mantovani, M.; Sabate, J.; Shetty, P.; Soria, M.; Spiekermann, U.; Tudge, C.; Vorster, H. H.; Wahlqvist, M.; Zerilli-Marimo, M. | The principles, definition and dimensions of the new nutrition science                                                                                      | 2005 | Public Health Nutrition                 |

|                                                                                                                                                                                                                        |                                                                                                                                                     |      |                                                           |
|------------------------------------------------------------------------------------------------------------------------------------------------------------------------------------------------------------------------|-----------------------------------------------------------------------------------------------------------------------------------------------------|------|-----------------------------------------------------------|
| Behbod, Behrooz;<br>Lauriola, Paolo;<br>Leonardi, Giovanni;<br>Crabbe, Helen; Close,<br>Rebecca; Staatsen,<br>Brigit; Knudsen,<br>Lisbeth E.; de Hoogh,<br>Kees; Medina, Sylvia;<br>Semenza, Jan C.;<br>Fletcher, Tony | Environmental and public health<br>tracking to advance knowledge<br>for Planetary Health                                                            | 2016 | European Journal of<br>Public Health                      |
| Benatar, Solomon                                                                                                                                                                                                       | Politics, power, poverty and<br>global health: systems and frames                                                                                   | 2016 | International Journal of<br>Health Policy &<br>Management |
| Bernard, P.                                                                                                                                                                                                            | Health psychology at the age of<br>Anthropocene                                                                                                     | 2019 | Health Psychology and<br>Behavioral Medicine              |
| Black, Daniel; Scally,<br>Gabriel; Hunt, Alistair;<br>Orme, Judy                                                                                                                                                       | We must look further upstream to<br>enable Planetary Health-literate<br>urban development                                                           | 2018 | The Lancet Planetary<br>Health                            |
| Black, Daniel; Scally,<br>Gabriel; Orme, Judy;<br>Hunt, Alistair;<br>Pilkington, Paul;<br>Lawrence, Roderick;<br>Ebi, Kristie                                                                                          | Moving health upstream in urban<br>development: reflections on the<br>operationalization of a<br>transdisciplinary case study                       | 2019 | Global Challenges                                         |
| Blackstone, Nicole<br>Tichenor; El-Abbadi,<br>Naglaa H; McCabe,<br>Margaret S; Griffin,<br>Timothy S; Nelson,<br>Miriam E                                                                                              | Linking sustainability to the<br>healthy eating patterns of the<br>Dietary Guidelines for<br>Americans: a modelling study                           | 2018 | The Lancet Planetary<br>Health                            |
| Bosurgi, Raffaella;<br>Horton, Richard                                                                                                                                                                                 | The Lancet Planetary Health: a<br>new journal for a new discipline--<br>a call for papers                                                           | 2017 | The Lancet                                                |
| Boylan, S.; Syrett, K.;<br>Colagiuri, R.                                                                                                                                                                               | Role of law at the non-<br>communicable diseases-climate<br>change interface: considerations<br>for planetary and population<br>health policy       | 2013 | Public Health                                             |
| Braitstein, P.; Lama, T.;<br>Keino, S.; Gladanac, B.;<br>Yego, F.; Cole, D.;<br>Tabu, J. S.; Cortinois,<br>A.; Tarus, C.; Fox, A.                                                                                      | Increasing food security and<br>nutrition resilience in response to<br>climate change in east Africa:<br>findings from a multisectoral<br>symposium | 2017 | The Lancet Global<br>Health                               |
| Brattig, Norbert W;<br>Tanner, Marcel;<br>Bergquist, Robert;<br>Utzinger, Jurg                                                                                                                                         | Impact of environmental changes<br>on infectious diseases: key<br>findings from an international<br>conference in Trieste, Italy in<br>May 2017     | 2019 | Acta Tropica                                              |
| Brousselle, Astrid;<br>Butzbach, Camille                                                                                                                                                                               | Redesigning public health for<br>Planetary Health                                                                                                   | 2018 | The Lancet Planetary<br>Health                            |

|                                                                                                                                                                                                                                                                    |                                                                                                                         |      |                                                                    |
|--------------------------------------------------------------------------------------------------------------------------------------------------------------------------------------------------------------------------------------------------------------------|-------------------------------------------------------------------------------------------------------------------------|------|--------------------------------------------------------------------|
| Brown, Alastair                                                                                                                                                                                                                                                    | Planetary Health digest                                                                                                 | 2019 | The Lancet Planetary Health                                        |
| Brown, Alastair;<br>Hinsley, Sam                                                                                                                                                                                                                                   | Planetary Health digest                                                                                                 | 2019 | The Lancet Planetary Health                                        |
| Brown, Andrew                                                                                                                                                                                                                                                      | Planetary Health                                                                                                        | 2013 | Interdisciplinary Environmental Review                             |
| Bull, Fiona C;<br>Hardman, Adrienne E                                                                                                                                                                                                                              | Walking: a best buy for public and Planetary Health                                                                     | 2018 | British Journal of Sports Medicine                                 |
| Buse, Chris G.;<br>Oestreicher, Jordan Sky; Ellis, Neville R.;<br>Patrick, Rebecca;<br>Brisbois, Ben; Jenkins, Aaron P.; McKellar, Kaileah; Kingsley, Jonathan; Gislason, Maya; Galway, Lindsay; McFarlane, Ro A.; Walker, Joanne; Frumkin, Howard; Parkes, Margot | Public health guide to field developments linking ecosystems, environments and health in the Anthropocene               | 2018 | Journal of Epidemiology and Community Health                       |
| Buse, Chris G; Smith, Maxwell; Silva, Diego S                                                                                                                                                                                                                      | Attending to scalar ethical issues in emerging approaches to environmental health research and practice                 | 2019 | Monash Bioethics Review                                            |
| Butler, Colin D                                                                                                                                                                                                                                                    | Limits to growth, planetary boundaries, and Planetary Health                                                            | 2017 | Current Opinion in Environmental Sustainability                    |
| Butler, Colin D                                                                                                                                                                                                                                                    | Philanthrocapitalism: promoting global health but failing Planetary Health                                              | 2019 | Challenges                                                         |
| Butler, Colin D                                                                                                                                                                                                                                                    | Planetary epidemiology: towards first principles                                                                        | 2018 | Current Environmental Health Reports                               |
| Campostrini, Stefano; Guerra, Ranieri                                                                                                                                                                                                                              | Can the scientific world positively influence decision makers on Planetary Health?                                      | 2018 | The Lancet                                                         |
| Canavan, Chelsey R.; Noor, Ramadhani A.; Golden, Christopher D.; Juma, Calestous; Fawzi, Wafaie                                                                                                                                                                    | Sustainable food systems for optimal Planetary Health                                                                   | 2017 | Transactions of the Royal Society of Tropical Medicine and Hygiene |
| Cannon, Geoffrey; Leitzmann, Claus                                                                                                                                                                                                                                 | The new nutrition science project                                                                                       | 2005 | Public Health Nutrition                                            |
| Caoili, Salvador Eugenio                                                                                                                                                                                                                                           | Antibodies, synthetic peptides and related constructs for Planetary Health based on green chemistry in the Anthropocene | 2018 | Future science OA                                                  |
| Cape, John; Mack, Jessica; Gomez, Jacob                                                                                                                                                                                                                            | A new leadership approach for Planetary Health                                                                          | 2017 | The Lancet Planetary Health                                        |

|                                                                                                                              |                                                                                                                                                                                         |      |                                              |
|------------------------------------------------------------------------------------------------------------------------------|-----------------------------------------------------------------------------------------------------------------------------------------------------------------------------------------|------|----------------------------------------------|
| Capon, Anthony                                                                                                               | Harnessing urbanisation for human wellbeing and Planetary Health                                                                                                                        | 2017 | The Lancet Planetary Health                  |
| Capon, Anthony G.; AC Talley, Nicholas J.; Horton, Richard C.;                                                               | Planetary Health: what is it and what should doctors do?                                                                                                                                | 2018 | Medical Journal of Australia                 |
| Carlson, Colin J; Trisos, Christopher H                                                                                      | Climate engineering needs a clean bill of health                                                                                                                                        | 2018 | Nature Climate Change                        |
| Chahbazi, John; Grow, Shelly                                                                                                 | Common foods and farming methods thought to promote health: what the data show                                                                                                          | 2008 | Primary Care                                 |
| Chen, Chong; Nakagawa, Shin                                                                                                  | Planetary Health and the future of human capacity: the increasing impact of planetary distress on the human brain                                                                       | 2018 | Challenges                                   |
| Clark, Helen                                                                                                                 | Governance for Planetary Health and sustainable development                                                                                                                             | 2015 | The Lancet                                   |
| Cole, Jennifer; Bickersteth, Sam                                                                                             | What's planetary about health? An analysis of topics covered in The Lancet Planetary Health's first year                                                                                | 2018 | The Lancet Planetary Health                  |
| Costa, Rosa; Alders, Robyn G.; Rukambile, Elpidius; Magoke, Godfrey; Dumas, Sarah E.; Maulaga, Wende; Jong, Joanita          | Family poultry: Multiple roles, systems, challenges, and options for sustainable contributions to household nutrition security through a Planetary Health lens                          | 2018 | Maternal & Child Nutrition                   |
| Davidson, Patricia M.                                                                                                        | Rockefeller Foundation-Lancet Commission report: A call to action for human health                                                                                                      | 2016 | International Journal of Nursing Studies     |
| De Paula, Nicole                                                                                                             | What is Planetary Health? Addressing the environment-health nexus in Southeast Asia in the era of the Sustainable Development Goals: opportunities for international relations scholars | 2018 | Revista Brasileira De Politica Internacional |
| de Sa, Thiago Hérick                                                                                                         | Can Coca Cola promote physical activity?                                                                                                                                                | 2014 | The Lancet                                   |
| Delany, Louise; Signal, Louise; Thomson, George                                                                              | International trade and investment law: a new framework for public health and the common good                                                                                           | 2018 | BMC Public Health                            |
| Demaio, Alessandro R.; Rockström, Johan                                                                                      | Human and Planetary Health: towards a common language                                                                                                                                   | 2015 | The Lancet                                   |
| Duane, Brett; Harford, Sara; Ramasubbu, Darshini; Stancliffe, Rachel; Pasdeki-Clewer, Eleni; Lomax, Richard; Steinbach, Inge | Environmentally sustainable dentistry: a brief introduction to sustainable concepts within the dental practice                                                                          | 2019 | British Dental Journal                       |

|                                                                                                                                                                                                                |                                                                                                                                             |      |                                                           |
|----------------------------------------------------------------------------------------------------------------------------------------------------------------------------------------------------------------|---------------------------------------------------------------------------------------------------------------------------------------------|------|-----------------------------------------------------------|
| Duboz, Raphael;<br>Echaubard, Pierre;<br>Promburom, Panomsak;<br>Kilvington, Margaret;<br>Ross, Helen; Allen,<br>Will; Ward, John;<br>Deffuant, Guillaume; de<br>Gariné-Wichatitsky,<br>Michel; Binot, Aurelie | Systems thinking in practice:<br>participatory modeling as a<br>foundation for integrated<br>approaches to health                           | 2018 | Frontiers in Veterinary<br>Science                        |
| Dune, Tinashe; Thomas<br>Astell-Burt; Rubab<br>Firdaus                                                                                                                                                         | The built environment and sexual<br>and reproductive health                                                                                 | 2017 | Australian and New<br>Zealand Journal of<br>Public Health |
| Dusheck, Jennie                                                                                                                                                                                                | Worried about climate change?<br>Ask your doctor                                                                                            | 2019 | Frontiers in Ecology<br>and the Environment               |
| Ebi, Kristie L.;<br>Frumkin, Howard;<br>Hess, Jeremy J.                                                                                                                                                        | Protecting and promoting<br>population health in the context of<br>climate and other global<br>environmental changes                        | 2017 | Anthropocene                                              |
| Emerich, Monica                                                                                                                                                                                                | The spirituality of sustainability:<br>healing the self to heal the world<br>through healthy living media                                   | 2006 | [Doctoral thesis]                                         |
| Eshel, Gidon; Martin,<br>Pamela                                                                                                                                                                                | Alignment of personal and<br>Planetary Health: beyond<br>greenhouse gases alone                                                             | 2009 | Epidemiology                                              |
| Ezeh, Alex                                                                                                                                                                                                     | Addressing Planetary Health<br>challenges in Africa                                                                                         | 2016 | Public Health Reviews                                     |
| Fernandez Ortiz, Anna;<br>Bueno Ortiz, Jose<br>Miguel                                                                                                                                                          | [Commitment to Planetary<br>Health]                                                                                                         | 2019 | Atención Primaria                                         |
| Fernando, Julian W.;<br>O'Brien, Léan V.;<br>Judge, Madeline;<br>Kashima, Yoshihisa                                                                                                                            | More than idyll speculation:<br>Utopian thinking for Planetary<br>Health                                                                    | 2019 | Challenges                                                |
| Filippelli, Gabriel M                                                                                                                                                                                          | Exploring the paradox of<br>increased global health and<br>degraded global environment:<br>how much borrowed time is<br>humanity living on? | 2018 | Geoscience Data<br>Journal                                |
| Fisher, Jack E;<br>Pedersen, Marie; Loft,<br>Steffen; Andersen,<br>Zorana J                                                                                                                                    | Opportunities and challenges<br>within urban health and<br>sustainable development                                                          | 2017 | Current Opinion in<br>Environmental<br>Sustainability     |
| Flowra, Mahfuza<br>Talukder;<br>Asaduzzaman,<br>Muhammad                                                                                                                                                       | Resurgence of infectious diseases<br>due to forced migration: is<br>Planetary Health and One Health<br>action synergistic?                  | 2018 | The Lancet Planetary<br>Health                            |
| Fontana, Luigi; Atella,<br>Vincenzo; Kammen,<br>Daniel M                                                                                                                                                       | Energy efficiency as a unifying<br>principle for human,<br>environmental, and global health                                                 | 2013 | F1000 Research                                            |

|                                                                                                                                                                                                                                 |                                                                                                                                                             |      |                                                                                          |
|---------------------------------------------------------------------------------------------------------------------------------------------------------------------------------------------------------------------------------|-------------------------------------------------------------------------------------------------------------------------------------------------------------|------|------------------------------------------------------------------------------------------|
| Foster, Alexander; Cole, Jennifer; Farlow, Andrew; Petrikova, Ivica                                                                                                                                                             | Planetary Health ethics: beyond first principles                                                                                                            | 2019 | Challenges                                                                               |
| Frank-White, Nathaniel Etheridge; Burns-Kirkness, Rowan; Frank, Erica                                                                                                                                                           | The effect of dietary and transportation choices on climate change                                                                                          | 2011 | Food and Nutrition Sciences                                                              |
| Friel, S; Bowen, K; Campbell-Lendrum, D; Frumkin, H; McMichael, A J; Rasanathan, K                                                                                                                                              | Climate change, noncommunicable diseases, and development: the relationships and common policy opportunities                                                | 2011 | Annual Review of Public Health                                                           |
| Frumkin, Howard; Haines, Andy                                                                                                                                                                                                   | Global environmental change and noncommunicable disease risks                                                                                               | 2019 | Annual Review of Public Health                                                           |
| Frumkin, Howard; Watts, Nicholas                                                                                                                                                                                                | Health, science, faith, and stewardship                                                                                                                     | 2018 | EcoHealth                                                                                |
| Fugelli, Per                                                                                                                                                                                                                    | Death and Planetary Health                                                                                                                                  | 2016 | The Lancet                                                                               |
| Gabrysch, Sabine                                                                                                                                                                                                                | Imagination challenges in Planetary Health: re-conceptualising the human-environment relationship                                                           | 2018 | The Lancet Planetary Health                                                              |
| Gagliano, Monica                                                                                                                                                                                                                | Planetary Health: are we part of the problem or part of the solution?                                                                                       | 2018 | Challenges                                                                               |
| Gagné, Thierry; Lapalme, Josée                                                                                                                                                                                                  | Multidisciplinarity in health promotion and the era of Planetary Health                                                                                     | 2019 | Health Promotion International                                                           |
| Garchitorena, A; Sokolow, SH; Roche, B; Ngonghala, C N; Jocque, M; Lund, A; Barry, M; Mordecai, E A; Daily, G C; Jones, J H; Andrews, J R; Bendavid, E; Luby, S P; LaBeaud, AD; Seetah, K; Guegan, J F; Bonds, M H; De Leo, GA  | Disease ecology, health and the environment: a framework to account for ecological and socio-economic drivers in the control of neglected tropical diseases | 2017 | Philosophical Transactions of the Royal Society of London, Series B: Biological Sciences |
| Garg, Ashish; Mithal, Varun; Chamber, Yashu; Brugere, Ivan; Chaudhari, Vijay; Dunham, Marc; Krishna, Vikrant; Krishnamurthy, Sairam; Vangala, Sruthi; Boriah, Shyam; Steinbach, Michael; Kumar, Vipin; Cho, Albert; Stanley, J. | GOPHER: global observation of Planetary Health and ecosystem resources                                                                                      | 2011 | 2011 Ieee International Geoscience and Remote Sensing Symposium                          |



|                                                                                                                                                                                                                        |                                                                                                                                                                                                                                      |      |                                               |
|------------------------------------------------------------------------------------------------------------------------------------------------------------------------------------------------------------------------|--------------------------------------------------------------------------------------------------------------------------------------------------------------------------------------------------------------------------------------|------|-----------------------------------------------|
| D.; Abraham, Teji;<br>Castilla-Rubio, Juan<br>Carlos; Potter,<br>Christopher; Klooster,<br>Steven                                                                                                                      |                                                                                                                                                                                                                                      |      |                                               |
| Geiger, Sonja M.; Otto,<br>Siegmar; Schrader, Ulf                                                                                                                                                                      | Mindfully green and healthy: an<br>indirect path from mindfulness to<br>ecological behavior                                                                                                                                          | 2018 | Frontiers in Psychology                       |
| Giles-Corti, Billie;<br>Lowe, Melanie;<br>Arundel, Jonathan                                                                                                                                                            | Achieving the SDGs: evaluating<br>indicators to be used to<br>benchmark and monitor progress<br>towards creating healthy and<br>sustainable cities                                                                                   | 2019 | Health Policy                                 |
| Gill, Stephen R.;<br>Benatar, Solomon R.                                                                                                                                                                               | Reflections on the political<br>economy of Planetary Health                                                                                                                                                                          | 2019 | Review of International<br>Political Economy  |
| Goldberg, Tony L.;<br>Patz, Jonathan A.                                                                                                                                                                                | The need for a global health ethic                                                                                                                                                                                                   | 2015 | The Lancet                                    |
| Golden, Christopher D.;<br>Seto, Katherine L.; Dey,<br>Madan M.; Chen, Oai<br>L.; Gephart, Jessica A.;<br>Myers, Samuel S.;<br>Smith, Matthew; Vaitla,<br>Bapu; Allison, Edward<br>H.                                  | Does aquaculture support the<br>needs of nutritionally vulnerable<br>nations?                                                                                                                                                        | 2017 | Frontiers in Marine<br>Science                |
| Golden, Christopher D;<br>Vaitla, Bapu;<br>Ravaoliny, Laurent;<br>Vonona, Miadana A; EJ<br>Gasta Anjaranirina;<br>Randriamady, Hervet J;<br>Glahn, Raymond P;<br>Guth, Sarah E; Fernald,<br>Lia CH; Myers, Samuel<br>S | Seasonal trends of nutrient intake<br>in rainforest communities of<br>north-eastern Madagascar                                                                                                                                       | 2019 | Public Health Nutrition                       |
| Goodman, B                                                                                                                                                                                                             | The debate on climate change and<br>health in the context of ecological<br>public health: a necessary<br>corrective to Costello et al's<br>'biggest global health threat', or<br>co-opted apologists for the<br>neoliberal hegemony? | 2014 | Public Health                                 |
| Goodman, Benny                                                                                                                                                                                                         | Developing the concept of<br>sustainability in Nursing                                                                                                                                                                               | 2016 | Nursing Philosophy                            |
| Gustafson, Craig                                                                                                                                                                                                       | Tieraona Low Dog, MD: the<br>many aspects of greening<br>medicine                                                                                                                                                                    | 2015 | Alternative Therapies in<br>Health & Medicine |
| Haahtela, Tari                                                                                                                                                                                                         | A biodiversity hypothesis                                                                                                                                                                                                            | 2019 | Allergy                                       |
| Hadjikakou, Michalis                                                                                                                                                                                                   | Trimming the excess:<br>environmental impacts of                                                                                                                                                                                     | 2017 | Ecological Economics                          |

|                                                                                                                                                                                  |                                                                                                                                                      |      |                             |
|----------------------------------------------------------------------------------------------------------------------------------------------------------------------------------|------------------------------------------------------------------------------------------------------------------------------------------------------|------|-----------------------------|
|                                                                                                                                                                                  | discretionary food consumption in Australia                                                                                                          |      |                             |
| Haines, Andy                                                                                                                                                                     | Addressing challenges to human health in the Anthropocene epoch—an overview of the findings of the Rockefeller/Lancet Commission on Planetary Health | 2016 | Public Health Reviews       |
| Haines, Andy; Hanson, Craig; Ranganathan, Janet                                                                                                                                  | Planetary Health Watch: integrated monitoring in the Anthropocene epoch                                                                              | 2018 | The Lancet Planetary Health |
| Haines, Andy; Whitmee, Sarah; Horton, Richard                                                                                                                                    | Planetary Health: a call for papers                                                                                                                  | 2014 | The Lancet                  |
| Hancock, Trevor                                                                                                                                                                  | Beyond science and technology: creating Planetary Health needs not just 'head stuff', but social engagement and 'heart, gut and spirit' stuff        | 2019 | Challenges                  |
| Hancock, Trevor; Capon, Anthony; Dooris, Mark; Patrick, Rebecca                                                                                                                  | One planet regions: Planetary Health at the local level                                                                                              | 2017 | The Lancet Planetary Health |
| Hays, Richard                                                                                                                                                                    | Including health promotion and illness prevention in medical education: a progress report                                                            | 2018 | Medical Education           |
| Hernando-Amado, Sara; Coque, Teresa M; Baquero, Fernando; Martinez, Jose L                                                                                                       | Defining and combating antibiotic resistance from One Health and global health perspectives                                                          | 2019 | Nature Microbiology         |
| Hill-Cawthorne, Grant A.                                                                                                                                                         | One Health/EcoHealth/Planetary Health and their evolution in: One Planet, One Health                                                                 | 2019 | Sydney University Press     |
| Hill-Cawthorne, Grant A; Capon, Anthony G; Sorrell, Tania C; Marais, Ben J                                                                                                       | A Planetary Health approach to emerging infections in Australia                                                                                      | 2017 | The Lancet                  |
| Hill-Cawthorne, Grant; Negin, Joel; Capon, Tony; Gilbert, Gwendolyn L; Nind, Lee; Nunn, Michael; Ridgway, Patricia; Schipp, Mark; Firman, Jenny; Sorrell, Tania C; Marais, Ben J | Advancing Planetary Health in Australia: focus on emerging infections and antimicrobial resistance                                                   | 2019 | BMJ Global Health           |
| Hinsley, Sam                                                                                                                                                                     | Planetary Health digest                                                                                                                              | 2019 | The Lancet Planetary Health |
| Horton, Richard                                                                                                                                                                  | Offline: Australia leads on climate and health                                                                                                       | 2015 | The Lancet                  |

|                                                                                                                                                                                                                                                                                 |                                                                                                  |      |                                 |
|---------------------------------------------------------------------------------------------------------------------------------------------------------------------------------------------------------------------------------------------------------------------------------|--------------------------------------------------------------------------------------------------|------|---------------------------------|
| Horton, Richard                                                                                                                                                                                                                                                                 | Offline: Medicine's theory of relativity                                                         | 2015 | The Lancet                      |
| Horton, Richard                                                                                                                                                                                                                                                                 | Offline: Planetary Health--a new vision for the post-2015 era                                    | 2013 | The Lancet                      |
| Horton, Richard                                                                                                                                                                                                                                                                 | Offline: Planetary Health--gains and challenges                                                  | 2016 | The Lancet                      |
| Horton, Richard                                                                                                                                                                                                                                                                 | Offline: Planetary Health's next frontier-biodiversity                                           | 2017 | The Lancet                      |
| Horton, Richard                                                                                                                                                                                                                                                                 | Offline: Planetary Health--the great acceleration                                                | 2017 | The Lancet                      |
| Horton, Richard                                                                                                                                                                                                                                                                 | Offline: Planetary Health—where next?                                                            | 2016 | The Lancet                      |
| Horton, Richard                                                                                                                                                                                                                                                                 | Offline: Planetary Health—worth everything                                                       | 2018 | The Lancet                      |
| Horton, Richard                                                                                                                                                                                                                                                                 | Offline: Progress towards Planetary Health                                                       | 2015 | The Lancet                      |
| Horton, Richard                                                                                                                                                                                                                                                                 | Offline: Reimagining the meaning of health                                                       | 2014 | The Lancet                      |
| Horton, Richard                                                                                                                                                                                                                                                                 | Offline: The health of our societies is in peril                                                 | 2018 | The Lancet                      |
| Horton, Richard                                                                                                                                                                                                                                                                 | Offline: Why the unity of life matters for our Planetary Health                                  | 2015 | The Lancet                      |
| Horton, Richard; Beaglehole, Robert; Bonita, Ruth; Raeburn, John; McKee, Martin; Wall, Stig                                                                                                                                                                                     | From public to Planetary Health: a manifesto                                                     | 2014 | The Lancet                      |
| Horton, Richard; Beaglehole, Robert; Bonita, Ruth; Raeburn, John; McKee, Martin; Wall, Stig                                                                                                                                                                                     | The Federation's pages - Planetary Health and the World Federation of Public Health Associations | 2014 | Journal of Public Health Policy |
| Horton, Richard; Lo, Selina                                                                                                                                                                                                                                                     | Planetary Health: a new science for exceptional action                                           | 2015 | The Lancet                      |
| Horwitz, Pierre; Parkes, Margot W.                                                                                                                                                                                                                                              | Intertwined strands for ecology in Planetary Health                                              | 2019 | Challenges                      |
| Houlton, Benjamin Z; Almaraz, Maya; Aneja, Viney; Austin, Amy T; Bai, Edith; Cassman, Kenneth G; Compton, Jana E; Davidson, Eric A; Erisman, Jan Willem; Galloway, James N; Gu, Baojing; Yao, Guolin; Martinelli, Luiz A; Scow, Kate; Schlesinger, William H; Tomich, Thomas P; | A world of cobenefits: solving the global nitrogen challenge                                     | 2019 | Earth's Future                  |

|                                                                                                           |                                                                                                                                                |      |                                               |
|-----------------------------------------------------------------------------------------------------------|------------------------------------------------------------------------------------------------------------------------------------------------|------|-----------------------------------------------|
| Wang, Chao; Zhang, Xin                                                                                    |                                                                                                                                                |      |                                               |
| Hudson-Edwards, Karen A.                                                                                  | Mining and Planetary Health: a GeoHealth - led special collection                                                                              | 2018 | Geoscience Data Journal                       |
| Iacobucci, Gareth                                                                                         | Planetary Health: WONCA urges family doctors to commit to action                                                                               | 2019 | BMJ (Clinical research ed.)                   |
| India State-Level Disease Burden Initiative Air Pollution Collaborators                                   | The impact of air pollution on deaths, disease burden, and life expectancy across the states of India: the Global Burden of Disease Study 2017 | 2019 | The Lancet Planetary Health                   |
| Jenkins, Aaron; Capon, Anthony; Negin, Joel; Marais, Ben; Sorrell, Tania; Parkes, Margot; Horwitz, Pierre | Watersheds in Planetary Health research and action                                                                                             | 2018 | The Lancet Planetary Health                   |
| Johnson, Hope                                                                                             | Eating for health and the environment: Australian regulatory responses for dietary change                                                      | 2015 | QUT Law Review                                |
| Johnston, Nancy; Rogers, Martha; Cross, Nadine; Sochan, Anne                                              | Global and Planetary Health: teaching as if the future matters                                                                                 | 2005 | Nursing Education Perspectives                |
| Kadandale, Sowmya; Marten, Robert; Smith, Richard                                                         | The palm oil industry and noncommunicable diseases                                                                                             | 2019 | Bulletin of the World Health Organization     |
| Kahn, Laura H; Kaplan, Bruce; Monath, Thomas; Woodall, Jack; Conti, Lisa                                  | A manifesto for Planetary Health                                                                                                               | 2014 | The Lancet                                    |
| Kamp, David                                                                                               | Letter to the Editors                                                                                                                          | 2016 | Health Environments Research & Design Journal |
| Katz, David L; Doughty, Kimberly N; Geagan, Kate; Jenkins, David A; Gardner, Christopher D                | Perspective: The public health case for modernizing the definition of protein quality                                                          | 2019 | Advances in Nutrition                         |
| Kilic, Hakan                                                                                              | Migration studies: a 21st century scholarship shaping human and Planetary Health                                                               | 2019 | OMICS: A Journal of Integrative Biology       |
| Kingsley, Jonathan; O'Brien, Jacqueline; Bailey, Aisling                                                  | Coffee consumers in university settings and Planetary Health                                                                                   | 2018 | The Lancet Planetary Health                   |
| Kirby, Tony                                                                                               | Tony Capon: the world's first professor of Planetary Health                                                                                    | 2018 | The Lancet                                    |
| Koger, Susan M.; Scott, Britain A.                                                                        | Teaching environmentally focused psychology                                                                                                    | 2012 | Ecopsychology                                 |

|                                                                                                                                                                                                                                                       |                                                                                                                   |      |                                                                   |
|-------------------------------------------------------------------------------------------------------------------------------------------------------------------------------------------------------------------------------------------------------|-------------------------------------------------------------------------------------------------------------------|------|-------------------------------------------------------------------|
| Kraak, Vivica I.I,<br>vivica51@vt.edu                                                                                                                                                                                                                 | Skills and tools for public health professionals to address corporate power to protect human and Planetary Health | 2018 | American Journal of Public Health                                 |
| Kunz, Thomas H;<br>Gauthreaux, Sidney A;<br>Hristov, Nickolay I;<br>Horn, Jason W; Jones, Gareth; Kalko, Elisabeth K V; Larkin, Ronald P; McCracken, Gary F; Swartz, Sharon M; Srygley, Robert B; Dudley, Robert; Westbrook, John K; Wikelski, Martin | Aeroecology: probing and modeling the aerosphere                                                                  | 2008 | Integrative and Comparative Biology                               |
| Kurth, Ann E.                                                                                                                                                                                                                                         | Planetary Health and the role of Nursing: a call to action                                                        | 2017 | Journal of Nursing Scholarship                                    |
| Landires, Ivan; Nuñez-Samudio, Virginia; Apraez-Ippolito, Giovanni; Castro, Guillermo                                                                                                                                                                 | Planetary Health: a new sociopolitical framework is urgently needed                                               | 2018 | The Lancet                                                        |
| Lang, Tim                                                                                                                                                                                                                                             | Reshaping the food system for ecological public health                                                            | 2009 | Journal of Hunger & Environmental Nutrition                       |
| Leffers, Jeanne; Levy, Ruth McDermott; Nicholas, Patrice K.; Sweeney, Casey F.                                                                                                                                                                        | Mandate for the Nursing profession to address climate change through Nursing education                            | 2017 | Journal of Nursing Scholarship                                    |
| Lehmkuhl, Dieter                                                                                                                                                                                                                                      | Das Thema Klimawandel und seine Bedeutung im Gesundheitssektor: Entwicklung, Akteure, Meilensteine                | 2019 | Bundesgesundheitsblatt - Gesundheitsforschung - Gesundheitsschutz |
| Lerner, Henrik; Berg, Charlotte                                                                                                                                                                                                                       | A comparison of three holistic approaches to health: One Health, EcoHealth, and Planetary Health                  | 2017 | Frontiers in Veterinary Science                                   |
| Liutsko, Liudmila                                                                                                                                                                                                                                     | The integrative model of personality and the role of personality in a Planetary Health context                    | 2019 | Personality and Individual Differences                            |
| Lo, Selina N.; Ferguson, Kaiya; Kayak, Eugenie; Faulkner, Kingsley                                                                                                                                                                                    | Planetary Health: the Australian chapter                                                                          | 2018 | Medical Journal of Australia                                      |
| Logan, Alan C.; Goldenberg, Joshua Z.; Guiltinan, Jane; Seely, Dugald; Katz, David L.                                                                                                                                                                 | North American naturopathic medicine in the 21st century: time for a seventh guiding principle - Scientia Critica | 2018 | Explore: The Journal of Science & Healing                         |
| Logan, Alan C; Prescott, Susan L                                                                                                                                                                                                                      | Astrofood, priorities and pandemics: reflections of an ultra-                                                     | 2017 | Challenges                                                        |

|                                                                                                                                                                          |                                                                                                                                                 |      |                                                          |
|--------------------------------------------------------------------------------------------------------------------------------------------------------------------------|-------------------------------------------------------------------------------------------------------------------------------------------------|------|----------------------------------------------------------|
|                                                                                                                                                                          | processed breakfast program and contemporary dysbiotic drift                                                                                    |      |                                                          |
| Logan, Alan C;<br>Prescott, Susan L;<br>Haahtela, Tari; Katz,<br>David L                                                                                                 | The importance of the exposome and allostatic load in the Planetary Health paradigm                                                             | 2018 | Journal of Physiological Anthropology                    |
| Macaux, William P.                                                                                                                                                       | Generative leadership: responding to the call for responsibility                                                                                | 2012 | Journal of Management Development                        |
| Maini, Rishma; Law,<br>Ronald; Duque,<br>Francisco 3rd; Balboa,<br>Gloria; Noda, Hiroyuki;<br>Nakamura, Sachiko;<br>Murray, Virginia                                     | Monitoring progress towards Planetary Health                                                                                                    | 2017 | BMJ (Clinical research ed.)                              |
| Marsden, Dawn                                                                                                                                                            | The cure is in the cause: a rationale and guide for scaling up Indigenous principles and practices for resilience and sustainability            | 2017 | Journal of Sustainability Education                      |
| Martin, Debbie; Ratima,<br>Mihi,<br>mihiratima@gmail.com;<br>Delormier, Treena;<br>Castleden, Heather                                                                    | Indigenous voices and knowledge systems – promoting Planetary Health, health equity, and sustainable development now and for future generations | 2019 | Global Health Promotion                                  |
| Mash, Robert                                                                                                                                                             | The Anthropocene - the biggest threat to health on the African continent                                                                        | 2019 | African Journal of Primary Health Care & Family Medicine |
| Meltzer, Helle<br>Margrete; Brantsæter,<br>Anne Lise; Trolle,<br>Ellen; Eneroth, Hanna;<br>Fogelholm, Mikael;<br>Ydersbond, Trond<br>Arild; Birgisdottir,<br>Bryndis Eva | Environmental sustainability perspectives of the Nordic diet                                                                                    | 2019 | Nutrients                                                |
| Middleton, John                                                                                                                                                          | Public health in England in 2016 - the health of the public and the public health system: a review                                              | 2017 | British Medical Bulletin                                 |
| Miller, Elise; Valenti,<br>Maria                                                                                                                                         | Healthy environments across generations = healthy aging                                                                                         | 2014 | International Journal of Aging & Human Development       |
| Minos, Dimitrios;<br>Butzlaff, Iris; Demmler,<br>Kathrin Maria; Rischke,<br>Ramona                                                                                       | Economic growth, climate change, and obesity                                                                                                    | 2016 | Current Obesity Reports                                  |
| Mishra, Shiva Raj;<br>Adhikari, Bipin                                                                                                                                    | Planetary Health in Nepal's post-earthquake rebuilding agenda: progress and future directions                                                   | 2019 | The Lancet Planetary Health                              |
| Molton, Sarah                                                                                                                                                            | The role of funders: Wellcome Trust                                                                                                             | 2016 | Public Health Reviews                                    |

|                                                                                                                                                                   |                                                                                                                               |      |                                              |
|-------------------------------------------------------------------------------------------------------------------------------------------------------------------|-------------------------------------------------------------------------------------------------------------------------------|------|----------------------------------------------|
| Moore, Michael;<br>McKee, Martin;<br>Borisch, Bettina;<br>Ricciardi, Walter                                                                                       | The global charter for the public's health                                                                                    | 2016 | European Journal of Public Health            |
| Moran, Dominic                                                                                                                                                    | Antimicrobial use and Planetary Health: developing a framework for priorities                                                 | 2018 | The Lancet Planetary Health                  |
| Morand, Serge                                                                                                                                                     | Anthropogenic global defaunation and its consequences for Planetary Health                                                    | 2018 | International Journal of Infectious Diseases |
| Morand, Serge;<br>Lajaunie, Claire                                                                                                                                | Linking biodiversity with health and well-being: consequences of scientific pluralism for ethics, values and responsibilities | 2019 | Asian Bioethics Review                       |
| Morisetti, Neil;<br>Blackstock, Jason J.                                                                                                                          | Impact of a changing climate on global stability, wellbeing, and Planetary Health                                             | 2017 | The Lancet Planetary Health                  |
| Moser, Adrian Mathias;<br>Stigler, Florian L;<br>Haditsch, Bernd                                                                                                  | Physicians' responsibility for Planetary Health                                                                               | 2017 | The Lancet Planetary Health                  |
| Moysés, Samuel J;<br>Soares, Renata C                                                                                                                             | Planetary Health in the Anthropocene                                                                                          | 2019 | Health Promotion International               |
| Myers, Samuel S                                                                                                                                                   | Planetary Health: protecting human health on a rapidly changing planet                                                        | 2017 | The Lancet                                   |
| Myers, Samuel S.;<br>Smith, Matthew R.;<br>Guth, Sarah; Golden,<br>Christopher D.; Vaitla,<br>Bapu; Mueller,<br>Nathaniel D.; Dangour,<br>Alan D.; Huybers, Peter | Climate change and global food systems: potential impacts on food security and undernutrition                                 | 2017 | Annual Review of Public Health               |
| Myers, Samuel S;<br>Golden, Christopher D;<br>Almada, Amalia A;<br>Grant, Liz; Planetary<br>Health Alliance                                                       | Planetary Health research in 2018: a call for abstracts                                                                       | 2017 | The Lancet Planetary Health                  |
| Myers, Samuel S;<br>Golden, Christopher D;<br>Almada, Amalia A;<br>Osofsky, Steven A;<br>Pongsiri, Montira J                                                      | Research in Planetary Health: a call for abstracts                                                                            | 2016 | The Lancet                                   |
| Nair, Amruta; Priya, S.                                                                                                                                           | Andrew Paul Haines                                                                                                            | 2019 | Current Science                              |
| Needoba, Joseph A;<br>Tratnyek, Paul G                                                                                                                            | Planetary Health thematic web collection                                                                                      | 2018 | Environmental Science - Processes & Impacts  |
| Nelson, David H.;<br>Prescott, Susan L.;<br>Logan, Alan C.; Bland,<br>Jeffrey S.                                                                                  | Clinical Ecology - transforming 21st-century medicine with Planetary Health in mind                                           | 2019 | Challenges                                   |

|                                                                                                                                                                                                                                                                                                                                             |                                                                                                                                      |      |                                                       |
|---------------------------------------------------------------------------------------------------------------------------------------------------------------------------------------------------------------------------------------------------------------------------------------------------------------------------------------------|--------------------------------------------------------------------------------------------------------------------------------------|------|-------------------------------------------------------|
| Nicholas, Patrice K;<br>Breakey, Suellen                                                                                                                                                                                                                                                                                                    | The economics of climate change and the intersection with conflict, violence, and migration: implications for the Nursing profession | 2019 | Nursing Economics                                     |
| Ooms, Gorik; Pas, Remco van de;<br>Decoster, Kristof;<br>Hammonds, Rachel                                                                                                                                                                                                                                                                   | Thinking out of the box: a green and social climate fund comment on "Politics, power, poverty and global health: systems and frames" | 2016 | International Journal of Health Policy and Management |
| Osofsky, Steven A;<br>Pongsiri, Montira J                                                                                                                                                                                                                                                                                                   | Operationalising Planetary Health as a game-changing paradigm: health impact assessments are key                                     | 2018 | The Lancet Planetary Health                           |
| Oxman, Andrew D                                                                                                                                                                                                                                                                                                                             | Key concepts for making informed choices                                                                                             | 2019 | Nature                                                |
| Parkes, Margot W.;<br>Allison, Sandra; Harder, Henry G.; Hoogeveen, Dawn; Kutzner, Diana; Aalhus, Melissa; Adams, Evan; Beck, Lindsay; Brisbois, Ben; Buse, Chris G.; Chiasson, Annika; Cole, Donald C.; Dolan, Shayna; Fauré, Anne; Fumerton, Raina; Gislason, Maya K.; Hadley, Louisa; Hallström, Lars K.; Horwitz, Pierre; Marks, Raissa | Addressing the environmental, community, and health impacts of resource development: challenges across scales, sectors, and sites    | 2019 | Challenges                                            |
| Pascal, Mathilde;<br>Beaudeau, Pascal;<br>Medina, Sylvia;<br>Hamilton, Nikita Charles                                                                                                                                                                                                                                                       | Global change: a public health researcher's ethical responsibility                                                                   | 2019 | Current Environmental Health Reports                  |
| Passarelli, Simone;<br>Canavan, Chelsey R.; Paarlberg, Robert; Juma, Calestous; Akyeampong, Emmanuel; Fekadu, Habtamu; Golden, Christopher D.; Gunaratna, Nilupa S.; Jaacks, Lindsay M.; Kennedy, Eileen; Madzorera, Isabel; McCann, James;                                                                                                 | Harnessing university strengths in multisectoral collaborations for Planetary Health                                                 | 2018 | Current Developments in Nutrition                     |



|                                                                                                                                                                                                                                        |                                                                                                                                   |      |                                                                                 |
|----------------------------------------------------------------------------------------------------------------------------------------------------------------------------------------------------------------------------------------|-----------------------------------------------------------------------------------------------------------------------------------|------|---------------------------------------------------------------------------------|
| Nwanze, Kanayo;<br>Sauerborn, Rainer;<br>Tang, Lixia; Webb,<br>Patrick; Willett, Walter<br>C.; Fawzi, Wafaie W.                                                                                                                        |                                                                                                                                   |      |                                                                                 |
| Patrick, Rebecca;<br>Armstrong, Fiona;<br>Hancock, Trevor;<br>Capon, Anthony; Smith,<br>James A.                                                                                                                                       | Climate change and health<br>promotion in Australia:<br>navigating political, policy,<br>advocacy and research challenges         | 2019 | Health Promotion<br>Journal of Australia                                        |
| Pattanayak, S. K.;<br>Kramer, R. A.; Vincent,<br>J. R.                                                                                                                                                                                 | Ecosystem change and human<br>health: implementation economics<br>and policy                                                      | 2017 | Philosophical<br>Transactions of the<br>Royal Society B:<br>Biological Sciences |
| Pattanayak, Subhrendu<br>K; Haines, Andy                                                                                                                                                                                               | Implementation of policies to<br>protect Planetary Health                                                                         | 2017 | The Lancet Planetary<br>Health                                                  |
| Perez-Escamilla, Rafael                                                                                                                                                                                                                | Food insecurity and the erosion of<br>human and Planetary Health: is<br>there light at the end of the<br>tunnel?                  | 2018 | American Journal of<br>Human Biology                                            |
| Perez-Escamilla, Rafael                                                                                                                                                                                                                | Food security and the 2015-2030<br>Sustainable Development Goals:<br>from human to Planetary Health:<br>perspectives and opinions | 2017 | Current Developments<br>in Nutrition                                            |
| Pongsiri, Montira J;<br>Bickersteth, Sam;<br>Colon, Cristina;<br>DeFries, Ruth;<br>Dhaliwal, Mandeep;<br>Georgeson, Lucien;<br>Haines, Andrew; Linou,<br>Natalia; Murray,<br>Virginia; Naeem,<br>Shahid; Small, Roy;<br>Ungvari, Judit | Planetary Health: from concept to<br>decisive action                                                                              | 2019 | The Lancet Planetary<br>Health                                                  |
| Pongsiri, Montira J;<br>Gatzweiler, Franz W;<br>Bassi, Andrea M;<br>Haines, Andy;<br>Demassieux, Fanny                                                                                                                                 | The need for a systems approach<br>to Planetary Health                                                                            | 2017 | The Lancet Planetary<br>Health                                                  |
| Poppy, Guy M;<br>Baverstock, Jenny                                                                                                                                                                                                     | Rethinking the food system for<br>human health in the<br>Anthropocene                                                             | 2019 | Current Biology                                                                 |
| Potter, John D                                                                                                                                                                                                                         | Monocultures - a blight on human<br>and Planetary Health in: Health                                                               | 2015 | ANU Press                                                                       |
| Potter, John D                                                                                                                                                                                                                         | Red and processed meat, and<br>human and Planetary Health of<br>People, Places and Planet                                         | 2017 | BMJ (Clinical research<br>ed.)                                                  |
| Potter, Teddie                                                                                                                                                                                                                         | Planetary Health: the next frontier<br>in Nursing education                                                                       | 2019 | Creative Nursing                                                                |

|                                                                                                                                                                                                                                                                                                                                                                          |                                                                                                                                   |      |                                                                   |
|--------------------------------------------------------------------------------------------------------------------------------------------------------------------------------------------------------------------------------------------------------------------------------------------------------------------------------------------------------------------------|-----------------------------------------------------------------------------------------------------------------------------------|------|-------------------------------------------------------------------|
| Pradyumna, Adithya                                                                                                                                                                                                                                                                                                                                                       | Planetary Health and food systems: insights from global SDGs                                                                      | 2018 | The Lancet Planetary Health                                       |
| Prescott, Susan L.; Kozyrskyj, Anita L.; Logan, Alan C.; Campbell, Dianne E.; Albrecht, Glenn; Kollman, Tobias R.; Takaro, Tim K.; Bosco, Anthony; Silva, Desiree; Lowry, Christopher A.; Olsen, Jonathan R.; Ellaway, Anne; McCrorie, Paul; Mitchell, Richard; Capaldi, Colin A.; Robinson, Jake M.; Daisley, Brendan A.; Trinder, Mark; McDowell, Tim W.; Welle, Hylke | Seventh annual conference of inVIVO Planetary Health on transforming life: unify personal, public, and Planetary Health           | 2018 | Challenges                                                        |
| Prescott, Susan L.; Logan, Alan C.                                                                                                                                                                                                                                                                                                                                       | Narrative medicine meets Planetary Health: mindsets matter in the Anthropocene                                                    | 2019 | Challenges                                                        |
| Prescott, Susan L.; Logan, Alan C.                                                                                                                                                                                                                                                                                                                                       | Planetary Health: from the wellspring of holistic medicine to personal and public health imperative                               | 2019 | Explore: The Journal of Science & Healing                         |
| Prescott, Susan L.; Logan, Alan C.; Albrecht, Glenn; Campbell, Dianne E.; Crane, Julian; Cunsolo, Ashlee; Holloway, John W.; Kozyrskyj, Anita L.; Lowry, Christopher A.; Penders, John; Redvers, Nicole; Renz, Harald; Stockholm, Jakob; Svanes, Cecilie; Wegienka, Ganesa                                                                                               | The Canmore Declaration: statement of principles for Planetary Health                                                             | 2018 | Challenges                                                        |
| Prescott, Susan L.; Logan, Alan C.; Katz, David L.                                                                                                                                                                                                                                                                                                                       | Preventive medicine for person, place, and planet: revisiting the concept of high-level wellness in the Planetary Health paradigm | 2019 | International Journal of Environmental Research and Public Health |
| Prescott, Susan L.; Wegienka, Ganesa; Logan, Alan C.; Katz, David L.                                                                                                                                                                                                                                                                                                     | Dysbiotic drift and biopsychosocial medicine: how the microbiome links personal, public and Planetary Health                      | 2018 | BioPsychoSocial Medicine                                          |

|                                                                                                                                                                     |                                                                                                                                                 |      |                                   |
|---------------------------------------------------------------------------------------------------------------------------------------------------------------------|-------------------------------------------------------------------------------------------------------------------------------------------------|------|-----------------------------------|
| Prescott, Susan L;<br>Logan, Alan C                                                                                                                                 | Down to Earth: Planetary Health and biophilosophy in the Symbiocene epoch                                                                       | 2017 | Challenges                        |
| Prescott, Susan L;<br>Logan, Alan C                                                                                                                                 | Larger than life: injecting hope into the planetary health paradigm                                                                             | 2018 | Challenges                        |
| Prescott, Susan L;<br>Pearson, Glenn; Snook, Jamie; Cunsolo, Ashlee                                                                                                 | On hume and Planetary Health                                                                                                                    | 2018 | The Lancet                        |
| Prior, Jason H; Connon, Irena Lc; McIntyre, Erica; Adams, Jon; Capon, Anthony; Kent, Jennifer; Rissel, Chris; Thomas, Leena E; Thompson, Susan M; Westcott, Harriet | Built environment interventions for human and Planetary Health: integrating health in climate change adaptation and mitigation                  | 2018 | Public Health Research & Practice |
| Qiao, Min; Ying, Guang-Guo; Singer, Andrew C.; Zhu, Yong-Guan                                                                                                       | Review of antibiotic resistance in China and its environment                                                                                    | 2018 | Environment International         |
| Rabinowitz, Peter MacGarr; Pappaioanou, Marguerite; Bardosh, Kevin Louis; Conti, Lisa                                                                               | A planetary vision for one health                                                                                                               | 2018 | BMJ Global Health                 |
| Ratima, Mihi; Martin, Debbie; Castleden, Heather; Delormier, Treena                                                                                                 | Indigenous voices and knowledge systems - promoting Planetary Health, health equity, and sustainable development now and for future generations | 2019 | Global Health Promotion           |
| Rayner, Geof; Gracia, Mabel; Young, Elizabeth; Mauleon, Jose R; Luque, Emilio; Rivera-Ferre, Marta G                                                                | Why are we fat? Discussions on the socioeconomic dimensions and responses to obesity                                                            | 2010 | Globalization and Health          |
| Reddy, K Srikanth; Roberts, Janet Hatcher                                                                                                                           | Mitigating air pollution: Planetary Health awaits a cosmopolitan moment                                                                         | 2019 | The Lancet Planetary Health       |
| Redvers, Nicole                                                                                                                                                     | The value of global Indigenous knowledge in Planetary Health                                                                                    | 2018 | Challenges                        |
| Reynolds, J. P.; Archer, S.; Pilling, M.; Kenny, M.; Hollands, G. J.; Marteau, T. M.                                                                                | Public acceptability of nudging and taxing to reduce consumption of alcohol, tobacco, and food: a population-based survey experiment            | 2019 | Social Science & Medicine         |
| Rideout, Karen; Kosatsky, Tom                                                                                                                                       | Fish for dinner? Balancing risks, benefits, and values in formulating food consumption advice                                                   | 2017 | Risk Analysis                     |

|                                                                                                                                 |                                                                                                                                          |      |                                                                                            |
|---------------------------------------------------------------------------------------------------------------------------------|------------------------------------------------------------------------------------------------------------------------------------------|------|--------------------------------------------------------------------------------------------|
| Robinson, Jake M.;<br>Breed, Martin F.                                                                                          | Green prescriptions and their co-benefits: integrative strategies for public and environmental health                                    | 2019 | Challenges                                                                                 |
| Robinson, Jake M.;<br>Mills, Jacob G.; Breed,<br>Martin F.                                                                      | Walking ecosystems in microbiome-inspired green infrastructure: an ecological perspective on enhancing personal and Planetary Health     | 2018 | Challenges                                                                                 |
| Rockefeller Jr., David                                                                                                          | The role of foundations: Rockefeller Foundation                                                                                          | 2016 | Public Health Reviews                                                                      |
| Rosa, William E.;<br>Upvall, Michele J.                                                                                         | The case for a paradigm shift: from global to planetary Nursing                                                                          | 2019 | Nursing Forum                                                                              |
| Rosa, William E;<br>Dossey, Barbara M;<br>Watson, Jean; Beck,<br>Deva-Marie; Upvall,<br>Michele J                               | The United Nations Sustainable Development Goals: the ethic and ethos of holistic Nursing                                                | 2019 | Journal of Holistic Nursing: Official Journal of the American Holistic Nurses' Association |
| Rosa, William E; Kurth,<br>Ann E; Sullivan-Marx,<br>Eileen; Shamian, Judith;<br>Shaw, Holly K; Wilson,<br>Lynda L; Crisp, Nigel | Nursing and midwifery advocacy to lead the United Nations Sustainable Development Agenda                                                 | 2019 | Nursing Outlook                                                                            |
| Rose, Diego; Willits-Smith, Amelia; Heller, Martin                                                                              | Diet and Planetary Health: single-item substitutions significantly reduce the carbon footprint of self-selected diets reported in NHANES | 2019 | Current Developments in Nutrition                                                          |
| Rosencrans, Kendra                                                                                                              | Nurturing faith for action: theological education and global responsibility                                                              | 2014 | Dialog: A Journal of Theology                                                              |
| Ruff, Tilman A.                                                                                                                 | WFPHA: World federation of public health associations                                                                                    | 2018 | Journal of Public Health Policy                                                            |
| Ryan, Jacinta T; Jones, Sandra; Hayes, Peter A; Craig, Jeffrey M                                                                | Leadership evolution for Planetary Health: a genomics perspective                                                                        | 2019 | Challenges                                                                                 |
| Salk, Jonathan D.                                                                                                               | Planetary Health: a new reality                                                                                                          | 2019 | Challenges                                                                                 |
| Sanchez-Sabate, Ruben; Sabate, Joan                                                                                             | Consumer attitudes towards environmental concerns of meat consumption: a systematic review                                               | 2019 | International Journal of Environmental Research and Public Health                          |
| Saunders, Patrick J.; Middleton, John D.                                                                                        | Response to Behbod B et al Environmental and public health tracking to advance knowledge for Planetary Health                            | 2017 | European Journal of Public Health                                                          |
| Scatigna, M;<br>D'Eugenio, S; Cesarini, V; Coppola, L; Lemma, P; Fabiani, L; Romano Spica, V; WDPP,                             | Physical activity as a key issue for promoting human health on a local and global scale: evidences and perspectives                      | 2019 | Annali di Igiene: Medicina Preventiva e di Comunita                                        |

|                                                                                                                                                                                                                                                                                      |                                                                                                                               |      |                                                                                          |
|--------------------------------------------------------------------------------------------------------------------------------------------------------------------------------------------------------------------------------------------------------------------------------------|-------------------------------------------------------------------------------------------------------------------------------|------|------------------------------------------------------------------------------------------|
| Working Group Doping Prevention Project                                                                                                                                                                                                                                              |                                                                                                                               |      |                                                                                          |
| Schenk, Elizabeth C.                                                                                                                                                                                                                                                                 | Environmental stewardship in Nursing: introducing the "WE ACT– PLEASE" framework                                              | 2019 | Creative Nursing                                                                         |
| Schuftan, Claudio; Legge, David; Sanders, David; Nadimpally, Sarojini                                                                                                                                                                                                                | A manifesto for Planetary Health                                                                                              | 2014 | The Lancet                                                                               |
| Schultz, Rosalie                                                                                                                                                                                                                                                                     | Implementation of policies to protect Planetary Health                                                                        | 2018 | The Lancet Planetary Health                                                              |
| Schutte, Stefanie; Gemenne, Francois; Zaman, Muhammad; Flahault, Antoine; Depoux, Anneliese                                                                                                                                                                                          | Connecting Planetary Health, climate change, and migration                                                                    | 2018 | The Lancet Planetary Health                                                              |
| Schwartz, Brian S; Parker, Cindy; Glass, Thomas A; Hu, Howard                                                                                                                                                                                                                        | Global environmental change: what can health care providers and the environmental health community do about it now?           | 2006 | Environmental Health Perspectives                                                        |
| Seltenrich, Nate                                                                                                                                                                                                                                                                     | Down to Earth: the emerging field of Planetary Health                                                                         | 2018 | Environmental Health Perspectives (Online)                                               |
| Shrivastava, Paul; Raivio, Kari; Kasuga, Fumiko; Tewksbury, Joshua; Haines, Andy; Daszak, Peter                                                                                                                                                                                      | Future Earth Health Knowledge-Action Network                                                                                  | 2016 | Public Health Reviews                                                                    |
| Singer, Merrill                                                                                                                                                                                                                                                                      | The spread of Zika and the potential for global arbovirus syndemics                                                           | 2017 | Global Public Health                                                                     |
| Siri, Jose Gabriel                                                                                                                                                                                                                                                                   | Sustainable, healthy cities: making the most of the urban transition                                                          | 2016 | Public Health Reviews                                                                    |
| Sokolow, Susanne H; Jones, Isabel J; Jocque, Merlijn; La, Diana; Cords, Olivia; Knight, Anika; Lund, Andrea; Wood, Chelsea L; Lafferty, Kevin D; Hoover, Christopher M; Collender, Phillip A; Remais, Justin V; Lopez-Carr, David; Fisk, Jonathan; Kuris, Armand M; De Leo, Giulio A | Nearly 400 million people are at higher risk of schistosomiasis because dams block the migration of snail-eating river prawns | 2017 | Philosophical Transactions of the Royal Society of London, Series B: Biological Sciences |
| Solomons, Noel W                                                                                                                                                                                                                                                                     | McCollum International Lecturer, Professor Mark L Wahlqvist, points us "Towards a new                                         | 2006 | The Journal of Nutrition                                                                 |

|                                                                                                    |                                                                                                                                                                  |      |                                                   |
|----------------------------------------------------------------------------------------------------|------------------------------------------------------------------------------------------------------------------------------------------------------------------|------|---------------------------------------------------|
|                                                                                                    | generation of international nutritional science and nutritional scientist" from the podium in Durban, South Africa                                               |      |                                                   |
| Spajic, Luke; Behrens, Georgia; Gralak, Sylvia; Moseley, Genevieve; Linholm, Daniel                | Beyond tokenism: meaningful youth engagement in Planetary Health                                                                                                 | 2019 | The Lancet Planetary Health                       |
| Stone, Sara B; Almada, Amalia A; Myers, Samuel S                                                   | A call for Planetary Health case studies                                                                                                                         | 2017 | The Lancet                                        |
| Stone, Sara B; Myers, Samuel S; Golden, Christopher D; Planetary Health Education Brainstorm Group | Cross-cutting principles for Planetary Health education                                                                                                          | 2018 | The Lancet Planetary Health                       |
| Stull, Valerie Jo                                                                                  | Improving global health through insects: The feasibility, acceptability, and potential impact of small-scale mini-livestock farming, with a case study of Zambia | 2018 | [Doctoral thesis]                                 |
| Sula-Raxhimi, Enkelejda; Butzbach, Camille; Brousselle, Astrid                                     | Planetary Health: countering commercial and corporate power                                                                                                      | 2019 | The Lancet Planetary Health                       |
| Swamy, Latha; Drazen, Erika; Bukoski, Jacob J; Johnson, Whitney R                                  | The future of tropical forests under the United Nations Sustainable Development Goals                                                                            | 2018 | Journal of Sustainable Forestry                   |
| Tait, Peter                                                                                        | Biosensitivity: the practical pathway to Planetary Health                                                                                                        | 2018 | Australian & New Zealand Journal of Public Health |
| Taylor, Tim; Mackie, Phil                                                                          | Carbon footprinting in health systems: one small step towards Planetary Health                                                                                   | 2017 | The Lancet Planetary Health                       |
| The Lancet                                                                                         | Climate change and health - action please, not words                                                                                                             | 2014 | The Lancet                                        |
| The Lancet                                                                                         | Planetary Health in the Anthropocene                                                                                                                             | 2019 | The Lancet                                        |
| The Lancet Global Health                                                                           | Vector control: time for a Planetary Health approach                                                                                                             | 2017 | The Lancet Global Health                          |
| The Lancet Planetary Health                                                                        | A sixth mass extinction? Why Planetary Health matters                                                                                                            | 2017 | The Lancet Planetary Health                       |
| The Lancet Planetary Health                                                                        | Promoting Planetary Health through culture                                                                                                                       | 2018 | The Lancet Planetary Health                       |
| The Lancet Planetary Health                                                                        | The bigger picture of Planetary Health                                                                                                                           | 2019 | The Lancet Planetary Health                       |
| The Lancet Planetary Health                                                                        | Welcome to The Lancet Planetary Health                                                                                                                           | 2017 | The Lancet Planetary Health                       |

|                                                                                                                                                                                                                                                                                                                                                                                              |                                                                                                                                                                           |      |                                            |
|----------------------------------------------------------------------------------------------------------------------------------------------------------------------------------------------------------------------------------------------------------------------------------------------------------------------------------------------------------------------------------------------|---------------------------------------------------------------------------------------------------------------------------------------------------------------------------|------|--------------------------------------------|
| Veidis, Erika M; Myers, Samuel S; Almada, Amalia A; Golden, Christopher D                                                                                                                                                                                                                                                                                                                    | A call for clinicians to act on Planetary Health                                                                                                                          | 2019 | The Lancet                                 |
| Velazquez, Jazmin Arguello; Negrutiu, Ioan                                                                                                                                                                                                                                                                                                                                                   | Agriculture and global physicochemical deregulation: planetary boundaries that challenge Planetary Health                                                                 | 2019 | The Lancet Planetary Health                |
| Vogel, Lauren                                                                                                                                                                                                                                                                                                                                                                                | Why aren't more doctors talking about climate change?                                                                                                                     | 2019 | CMAJ: Canadian Medical Association Journal |
| Wahl, D. C.                                                                                                                                                                                                                                                                                                                                                                                  | Design for human and Planetary Health: a transdisciplinary approach to sustainability in: Management of Natural Resources, Sustainable Development and Ecological Hazards | 2006 | WIT Press                                  |
| Wahlqvist, Mark L.                                                                                                                                                                                                                                                                                                                                                                           | International trends in nutritionally-related health and their implication for health policy                                                                              | 2008 | Asia Pacific Journal of Clinical Nutrition |
| Walpole, Sarah Catherine; Barna, Stefi; Richardson, Janet; Rother, Hanna-Andrea                                                                                                                                                                                                                                                                                                              | Sustainable healthcare education: integrating Planetary Health into clinical education                                                                                    | 2019 | The Lancet Planetary Health                |
| Watts, Geoff                                                                                                                                                                                                                                                                                                                                                                                 | Judith Rodin: on the path to resilience in Planetary Health                                                                                                               | 2015 | The Lancet                                 |
| Webb, Kinari                                                                                                                                                                                                                                                                                                                                                                                 | Planetary Health in the tropics: how community health-care doubles as a conservation tool                                                                                 | 2018 | The Lancet Global Health                   |
| Whitmee, Sarah; Haines, Andy; Beyrer, Chris; Boltz, Frederick; Capon, Anthony G; de Souza Dias, Braulio Ferreira; Ezeh, Alex; Frumkin, Howard; Gong, Peng; Head, Peter; Horton, Richard; Mace, Georgina M; Marten, Robert; Myers, Samuel S; Nishtar, Sania; Osofsky, Steven A; Pattanayak, Subhrendu K; Pongsiri, Montira J; Romanelli, Cristina; Soucat, Agnes; Vega, Jeanette; Yach, Derek | Safeguarding human health in the Anthropocene epoch: report of The Rockefeller Foundation-Lancet Commission on Planetary Health                                           | 2015 | The Lancet                                 |

|                                                                                                                       |                                                                                                                                                  |      |                             |
|-----------------------------------------------------------------------------------------------------------------------|--------------------------------------------------------------------------------------------------------------------------------------------------|------|-----------------------------|
| Willett, Walter                                                                                                       | Pushing for Planetary Health diets: a summary of the EAT-Lancet Commission report                                                                | 2019 | Food Australia              |
| Wilson, Marisa; Gathorne-Hardy, Alf; Alexander, Peter; Boden, Lisa                                                    | Why "culture" matters for Planetary Health                                                                                                       | 2018 | The Lancet Planetary Health |
| Wolfson, Mariel Louise                                                                                                | The ecology of a healthy home: energy, health, and housing in America, 1960–1985                                                                 | 2012 | [Doctoral thesis]           |
| Xie, Edward; de Barros, Enrique Falceto; Abelsohn, Alan; Stein, Airtton Tetelbom; Haines, Andy                        | Challenges and opportunities in Planetary Health for primary care providers                                                                      | 2018 | The Lancet Planetary Health |
| Yates-Doerr, Emily                                                                                                    | Counting bodies? On future engagements with science studies in medical anthropology                                                              | 2017 | Anthropology & Medicine     |
| Yong-Guan Zhu; Gillings, Michael; Simonet, Pascal; Stekel, Dov; Banwart, Steven; Penuelas, Josep                      | Human dissemination of genes and microorganisms in Earth's critical zone                                                                         | 2018 | Global Change Biology       |
| Young, Carrie E.                                                                                                      | The impact of narrative and participatory drama on social interactions, attitudes, and efficacy around health and environmental issues in Malawi | 2017 | [Doctoral thesis]           |
| Zhu, Yong-Guan; Zhao, Yi; Zhu, Dong; Gillings, Michael; Penuelas, Josep; Ok, Yong Sik; Capon, Anthony; Banwart, Steve | Soil biota, antimicrobial resistance and Planetary Health                                                                                        | 2019 | Environment International   |
